# Supplementary material for: Upconversion fluorescent nanoprobe based on the 4-NP reversible structure for a wide range of pH determination
Source: Royal Society of Chemistry journal article supplement (doi:10.1039/d2nj01803a), 2022-01-01
Supplement: d2nj01803a1.pdf [file d2nj01803a1.pdf]

## Supporting Information

### Upconversion fluorescent nanoprobe based on 4-NP reversible structure for a wide range of pH determination

Meirong Fu,<sup>a</sup> Min Yang,<sup>a</sup> and Xia Xu\*<sup>a</sup>

<sup>a</sup> College of Science, Gansu Agricultural University, Lanzhou 730070, P. R. China. E-mail:

*xuxia@gsau.edu.cn*

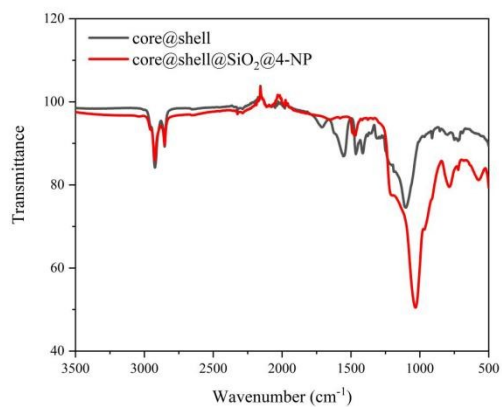

**Fig. S1** FT-IR spectra of core@shell and core@shell@SiO<sub>2</sub>@4-NP nanocrystals

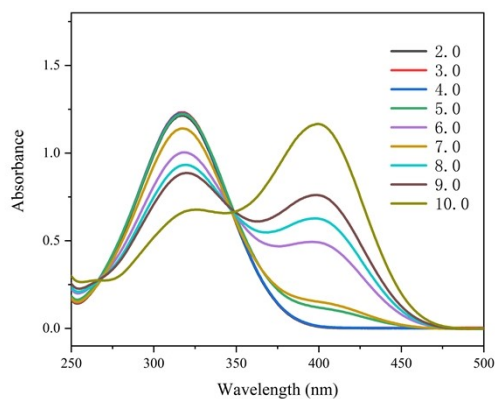

**Fig. S2** UV-visible absorption spectra of 4-NP (50  $\mu\text{M}$ ) at different pH conditions.

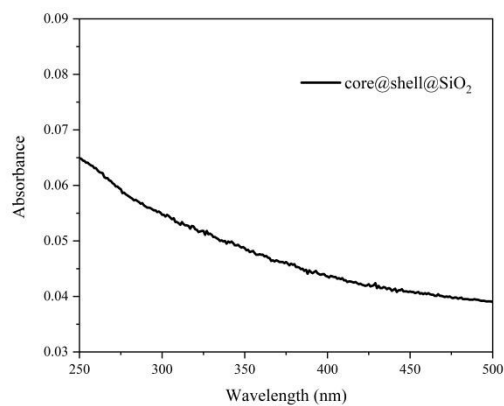

**Fig. S3** UV-visible absorption spectra of core@shell@SiO<sub>2</sub>

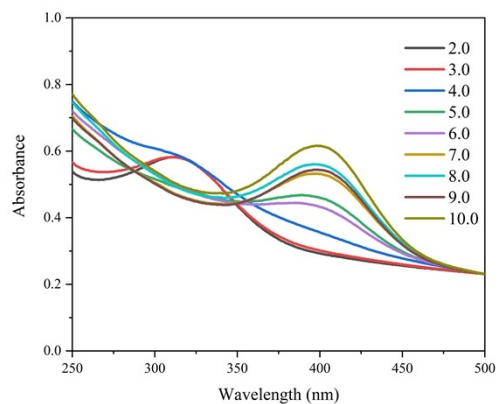

**Fig. S4** UV-visible absorption spectra of 4-NP (50 μM) at different pH conditions.

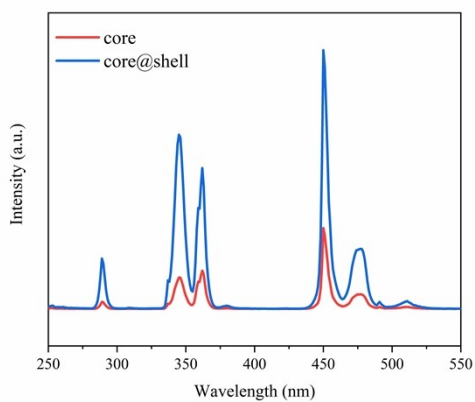

**Fig. S5** Upconversion fluorescence spectra of core and core@shell nanomaterials under 980 nm excitation.

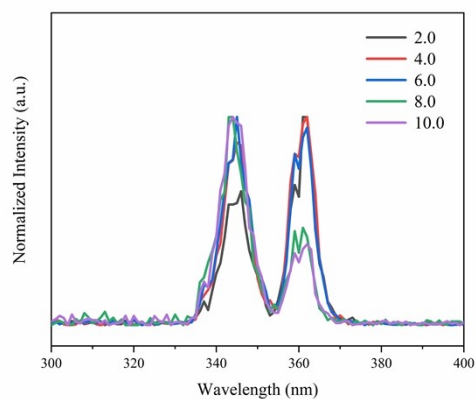

**Fig. S6** Normalized upconversion fluorescence emission spectra of core@shell@SiO<sub>2</sub>@4-NP in different pH under 980 nm excitation with the same power.

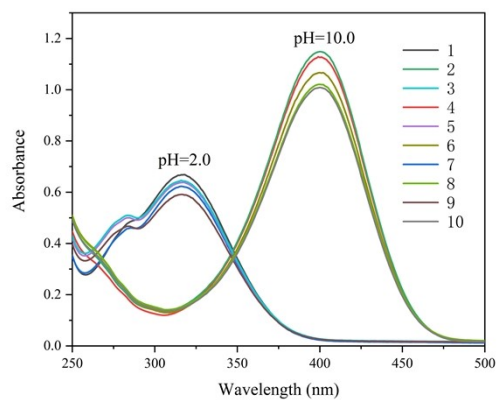

**Fig. S7** UV-vis absorption spectra of the reversibility of 4-NP solution in alkaline and acidic solutions (at pH= 2.0, pH= 10.0).
